# Supplementary material for: Nonspherical chiral helical polymer particles with programmable morphology prepared by electrospraying
Source: Royal Society of Chemistry journal article supplement (doi:10.1039/c9nr07816a), 2019-01-01
Supplement: c9nr07816a1.pdf [file c9nr07816a1.pdf]

## Nonspherical chiral helical polymer particles with programmable morphology prepared by electrospaying

Pengpeng Li,<sup>a,b</sup> Kai Pan<sup>b</sup> Jianping Deng<sup>\*a,b</sup>

<sup>a</sup>State Key Laboratory of Chemical Resource Engineering and <sup>b</sup>College of Materials Science and Engineering, Beijing University of Chemical Technology, Beijing 100029, China.

**Table S1.** GPC test data.

Polymerization were performed under conditions: monomer concentration 0.05M; catalyst concentration 0.005M; the reaction solvent CHCl<sub>3</sub>, 30 °C for 3 h.

| Polymers                                     | PA <sup>c</sup> | R-FA <sup>c</sup> | Mn                 | Mw/Mn |
|----------------------------------------------|-----------------|-------------------|--------------------|-------|
| PPA                                          | 10              | 0                 | 47000 <sup>a</sup> | 1.3   |
| poly(R-FA <sub>2</sub> -co-PA <sub>8</sub> ) | 8               | 2                 | 15479 <sup>b</sup> | 3.7   |
| poly(R-FA <sub>5</sub> -co-PA <sub>5</sub> ) | 5               | 5                 | 7045 <sup>b</sup>  | 2.2   |
| poly(R-FA <sub>8</sub> -co-PA <sub>2</sub> ) | 2               | 8                 | 5125 <sup>b</sup>  | 1.9   |
| R-PFA                                        | 0               | 10                | 4930 <sup>b</sup>  | 1.8   |

<sup>a</sup>Measured by GPC (polystyrene as standards; toluene as eluent)

<sup>b</sup>Measured by GPC (polystyrene as standards; THF as eluent)

<sup>c</sup>The molar ratio of the comonomer.

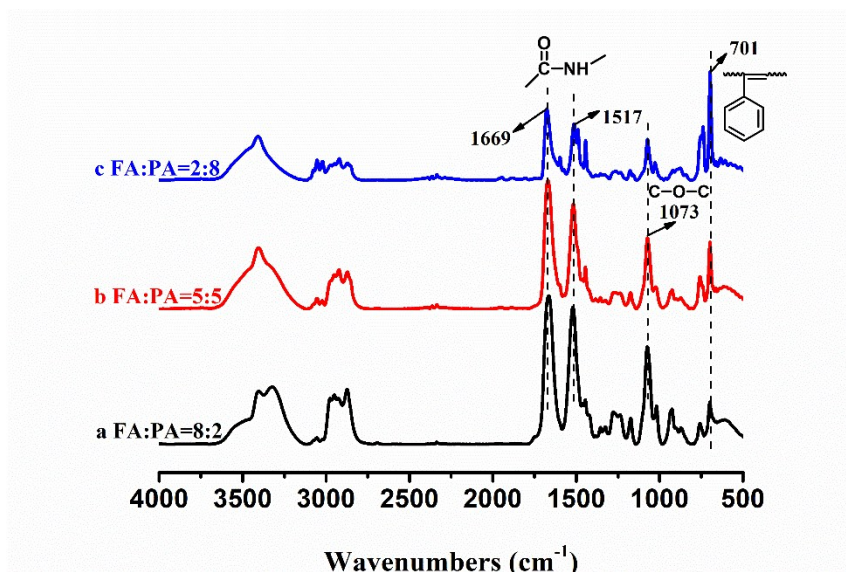

**Figure S1.** FT-IR spectra of poly(R-FA<sub>8</sub>-co-PA<sub>2</sub>) (a), poly(R-FA<sub>5</sub>-co-PA<sub>5</sub>) (b), and poly(R-FA<sub>2</sub>-co-PA<sub>8</sub>) (c). The spectra were recorded in KBr tablet.

**Table S2.** Solubility of PPA and PFA in common electrospay solvents (g/mL).

| Solvent \ polymer | DMF   | Toluene | CHCl <sub>3</sub> | Dioxane | OX   | THF   |
|-------------------|-------|---------|-------------------|---------|------|-------|
| PPA               | /     | 0.40    | ≫0.50             | 0.007   | 0.50 | 0.01  |
| PFA               | >1.00 | ≫1.00   | ≫1.00             | 0.95    | 0.20 | >1.00 |

“/”: Almost insoluble

**Table S3.** Preparation of electrospaying solutions.

| Polymers | PPA | PFA | Copolymers | R-PFA <sub>8</sub> -b-PPA <sub>2</sub><br>(v/v) | R-PFA <sub>5</sub> -b-PPA <sub>5</sub><br>(v/v) | R-PFA <sub>2</sub> -b-PPA <sub>8</sub> (v/v) |
|----------|-----|-----|------------|-------------------------------------------------|-------------------------------------------------|----------------------------------------------|
| Solvents | OX  | DMF | DMF        | DMF:OX = 4:1                                    | OX: DMF = 4:1                                   | OX                                           |

**Table S4.** Electrospaying parameters

| ES particles | Concentrations<br>(wt %) | Positive<br>Voltage<br>(+ kV) | Negative<br>Voltage<br>(- kV) | Solidification<br>distance (cm) | Spinning speed<br>(mL/min) |
|--------------|--------------------------|-------------------------------|-------------------------------|---------------------------------|----------------------------|
| PPA          | 17~26                    | 7                             | 2                             | 16                              | 0.004                      |
| PFA          | 20~38                    | 9                             | 2                             | 16                              | 0.004                      |
| Copolymers   | 17~44                    | 11                            | 2                             | 16                              | 0.004                      |
| Blends       | 23~28                    | 7                             | 2                             | 16                              | 0.004                      |

Temperature 30 °C, 35% RH, stainless steel needle (i.d.:0.4mm), plastic syringe (2.5 mL).

The polymer solutions were placed in a 2.5 ml syringe and was continuously pushed by the syringe pump at a flow rate of 0.004 ml/h to a stainless steel blunt nozzle with a stainless-steel needle (i.d.: 0.4 mm), which was connected to the high-voltage power supply. The high-voltage power supply was used to generate 5-12 kV potential difference between the nozzle and the grounded aluminum foil. A spraying distance of 16 cm between the nozzle and the collector was chosen for each set of experiments.

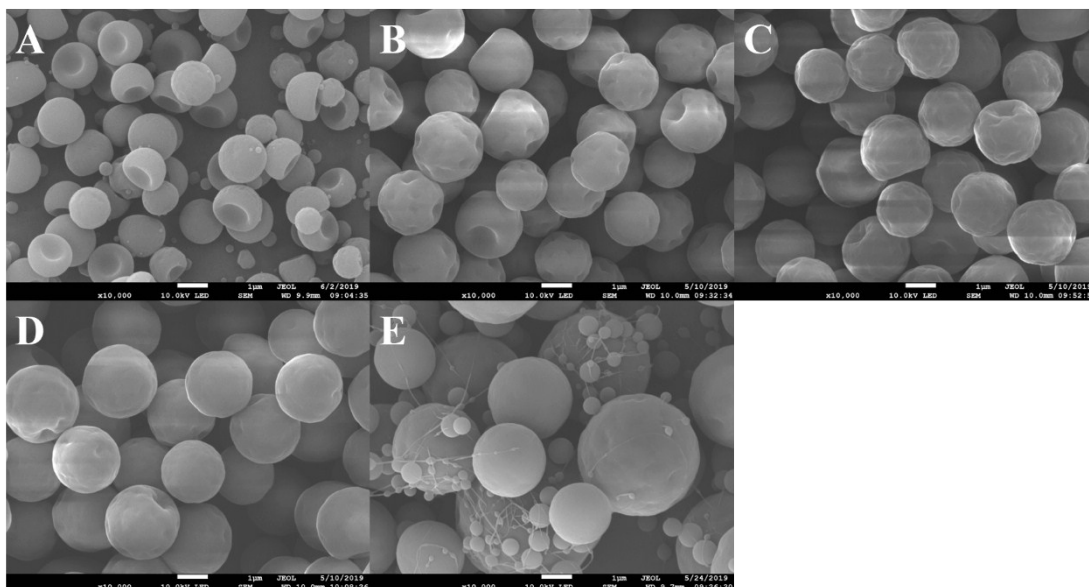

**Figure S2.** SEM images of the particles made of R-PFA (A, 20 wt%), (B, 26 wt%), (C, 28 wt%), (D, 30 wt%) and (E, 38 wt%) by electrospaying. DMF as solvent.

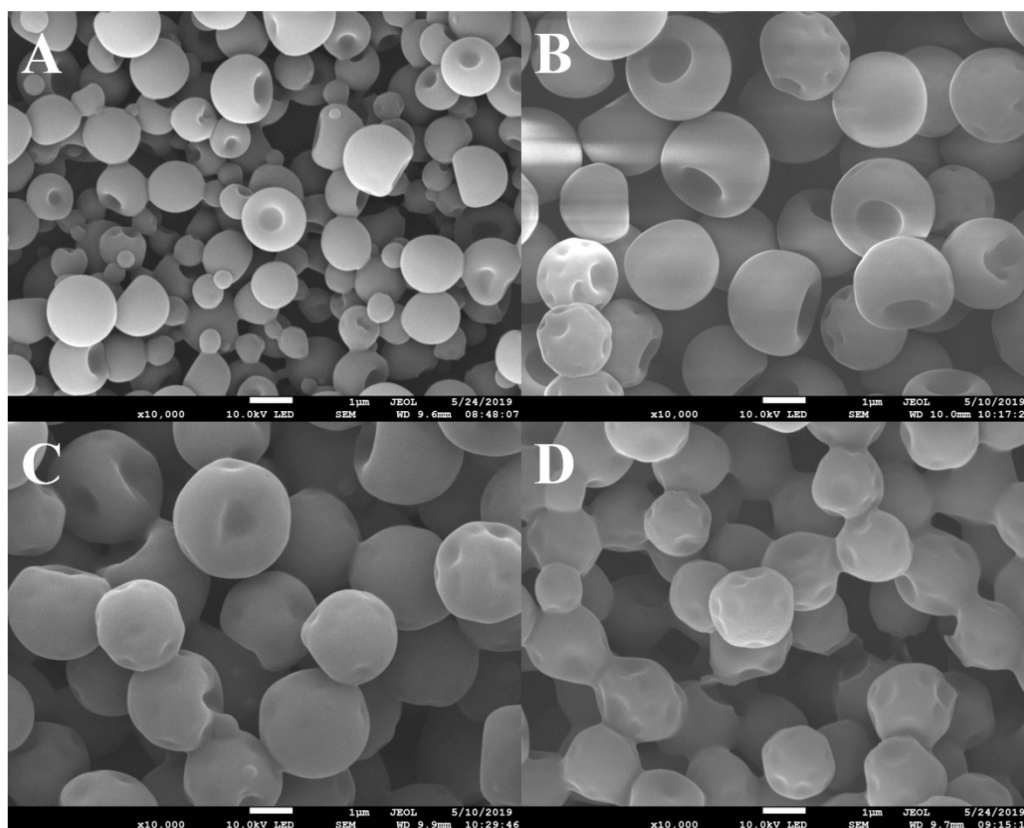

**Figure S3.** SEM images of the particles made of poly(R-FA<sub>8</sub>-co-PA<sub>2</sub>) (A, 26 wt%), (B, 28 wt%), (C, 31 wt%) and (D, 34 wt%) by electrospaying. DMF as solvent.

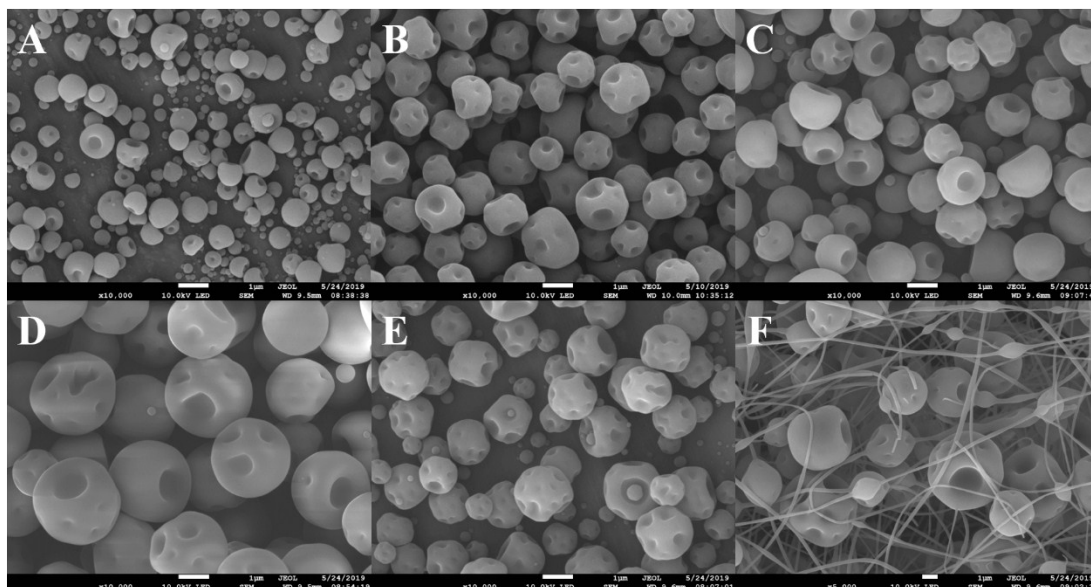

**Figure S4.** SEM images of the particles made of poly(R-FA<sub>5</sub>-co-PA<sub>5</sub>) (A, 17 wt%), (B, 23 wt%), (C, 28 wt%), (D, 38 wt%), (E, 41 wt%) and (F, 44 wt%) by electrospaying. DMF as solvent.

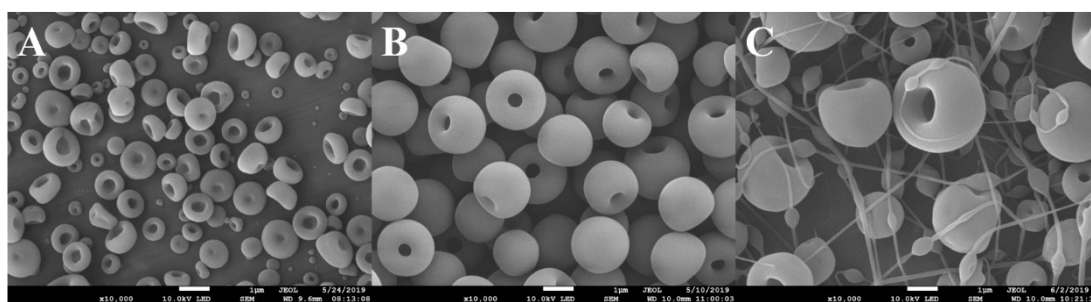

**Figure S5.** SEM images of the particles made of poly(R-FA<sub>2</sub>-co-PA<sub>8</sub>) (A, 17 wt%), (B, 28 wt%) and (C, 33 wt%) by electrospaying.

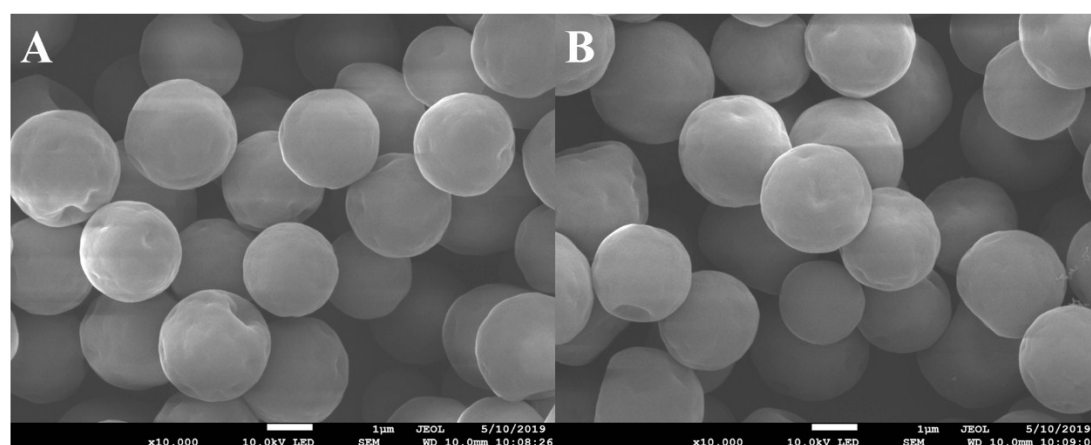

**Figure S6.** SEM images of the particles made of R-PFA (A, 30 wt%), and S-PFA (B, 30 wt%) by electrospaying.

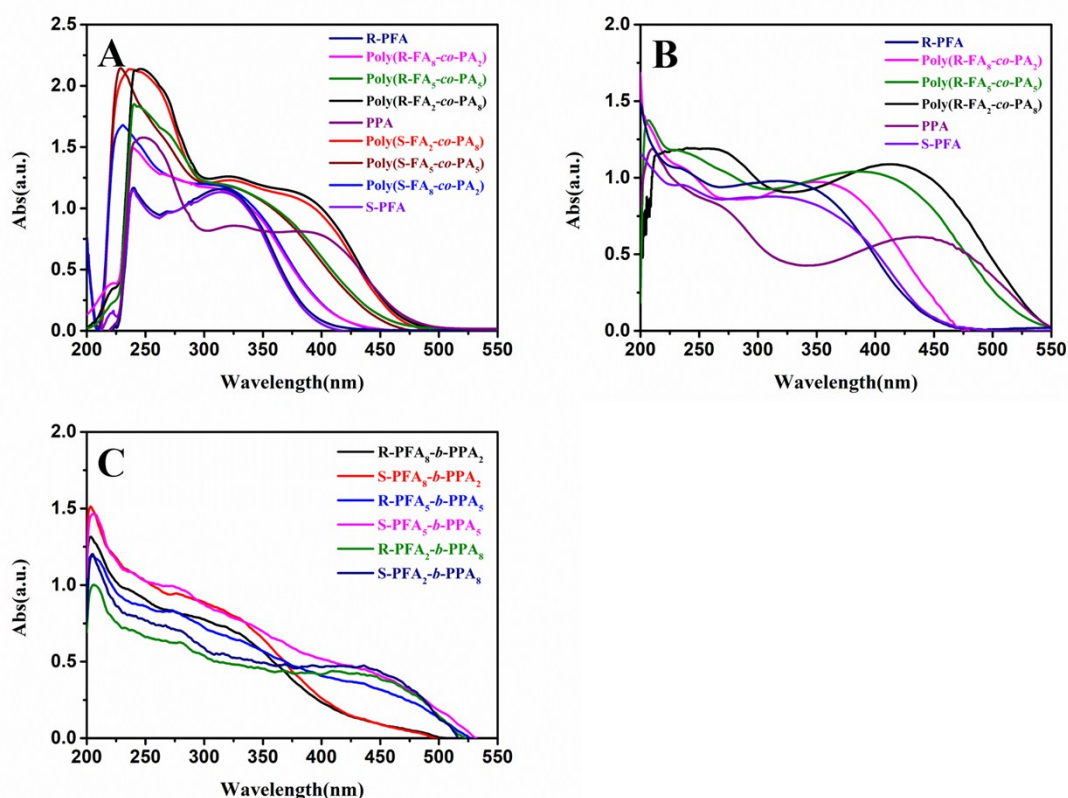

**Figure S7.** UV-vis absorption spectra recorded in electrospayed particles made of PPA, R(S)-PFA and their copolymers and blends, corresponding to different test methods: solution CD test method (A) and solid potassium bromide tablet CD test method (B, C). The CD spectra were recorded at room temperature and using KBr tablets.

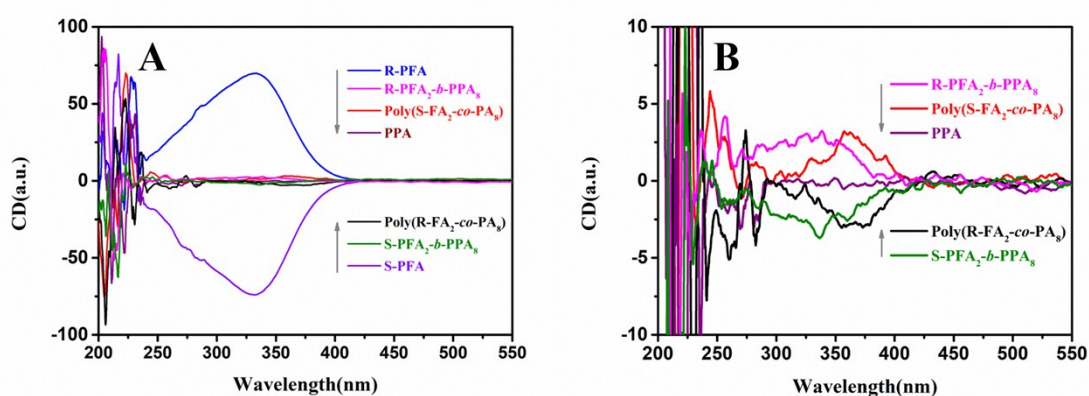

**Figure S8.** CD spectra of PPA, R(S)-PFA, poly(R(S)-FA<sub>2</sub>-co-PA<sub>8</sub>) and R(S)-PFA<sub>2</sub>-b-PPA<sub>8</sub>. The CD spectra were recorded by dissolving them in THF (A, B), B is the partially enlarged spectra. The CD spectra were recorded at room temperature.

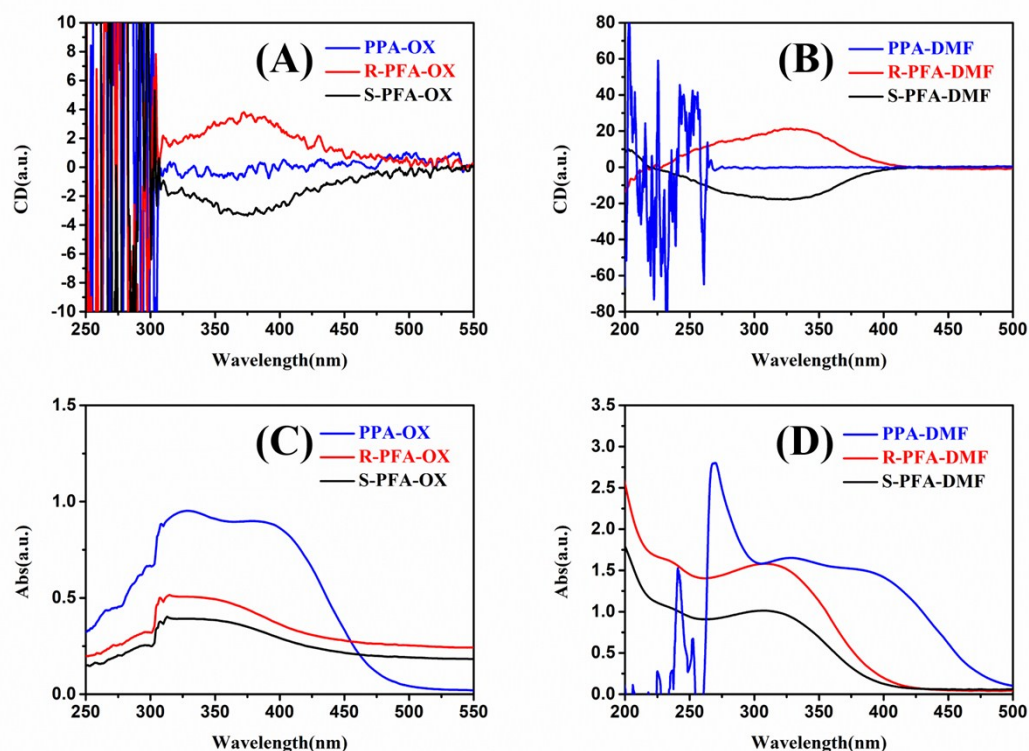

**Figure S9.** Typical CD & UV-vis absorption spectra of electrospayed particles consisting of PPA, R(S)-PFA. The CD & UV-vis absorption spectra were recorded by dissolving them in OX (A, C), DMF (B, D). The CD spectra were recorded at room temperature.

Herein, we take electrospayed particles made from R(S)-PFA and PPA as examples to investigate the chirality of particles in OX and DMF. The results show that CD peaks appeared mainly at 300-450 nm. The UV-vis absorption peaks appear in the corresponding position. This indicates that the solvent used in electrospaying does not affect the optical activity of the polymers. The difference of the CD effects (and UV-vis absorptions) should be due to the varied solubility of the same polymer in the solvents.

## Experimental Section

### Measurements

Fourier transform infrared (FT-IR) spectra were recorded with a Nicolet NEXUS 670 spectrophotometer (KBr tablet). Circular dichroism (CD) and UV-vis absorption spectra were conducted on a Jasco-815 spectrometer. The morphology of samples was observed with a Hitachi S-7800 scanning electron microscope (SEM). Number-average molecular weight and molecular weight polydispersity were determined by GPC (polystyrene as standards; toluene and THF as eluent). Electrospaying was conducted in electrospinning machine (TEADFS-100).
